# Supplementary material for: CHIP functions as an oncogene by promoting colorectal cancer metastasis via activation of MAPK and AKT signaling and suppression of E-cadherin
Source: PubMed Central journal article supplement (PMC6008917; doi:10.1186/s12967-018-1540-5), 2018-06-19

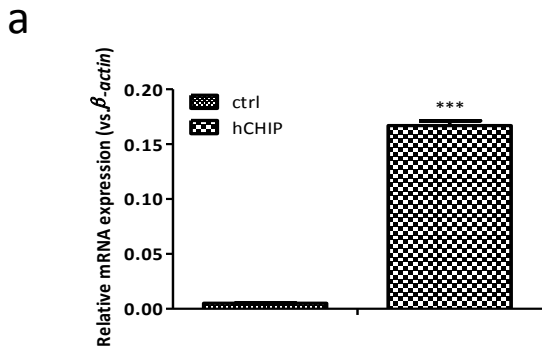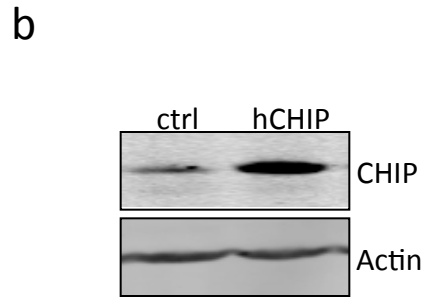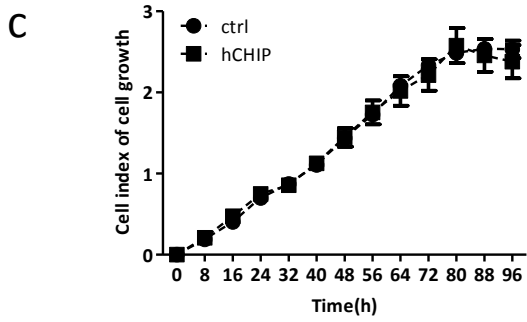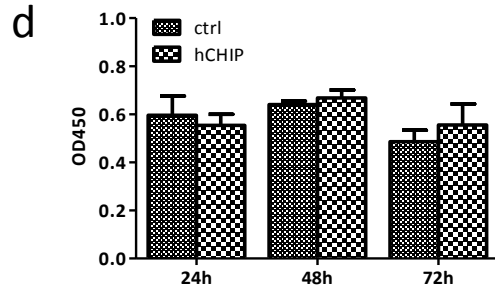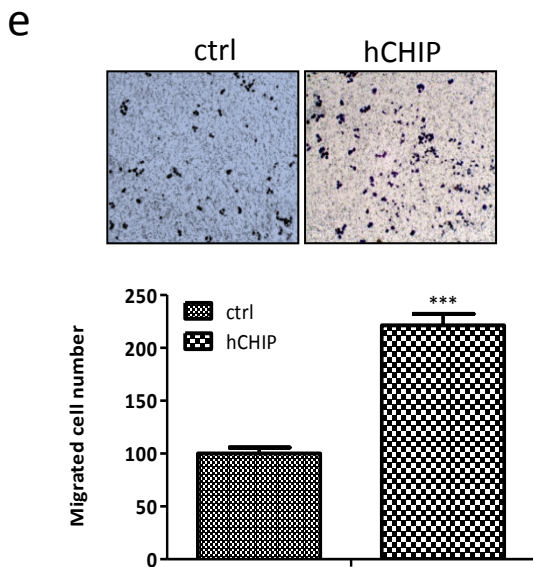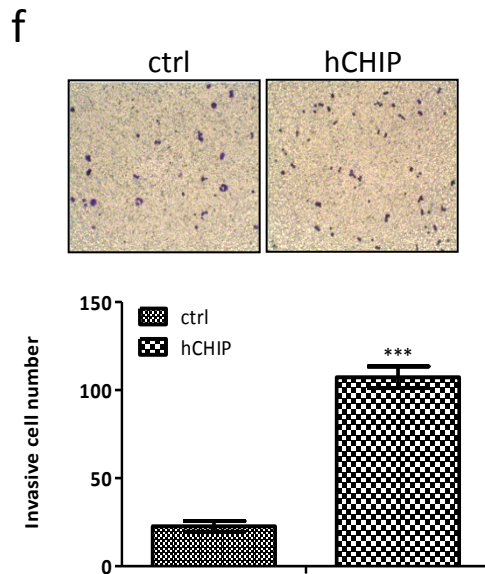

Supplement: 12967_2018_1540_MOESM4_ESM.pdf [file 12967_2018_1540_MOESM4_ESM.pdf]
